# Supplementary material for: Inhibition of cannabinoid receptor type 1 sensitizes triple-negative breast cancer cells to ferroptosis via regulating fatty acid metabolism
Source: PubMed Central journal article supplement (PMC9492666; doi:10.1038/s41419-022-05242-5), 2022-09-21

# Supplementary Figure 1

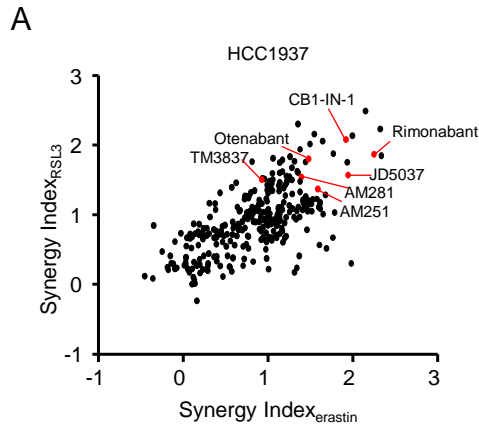

**B**

HCC1937

|                       |   |   |   |   |   |   |
|-----------------------|---|---|---|---|---|---|
| DMSO                  | + | - | - | - | - | - |
| erastin (5.0 $\mu$ M) | - | + | - | - | - | - |
| RSL3 (0.5 $\mu$ M)    | - | - | + | - | - | - |
| ML210 (1.0 $\mu$ M)   | - | - | - | + | - | - |
| FIN56 (0.5 $\mu$ M)   | - | - | - | - | + | - |
| CIL56 (0.5 $\mu$ M)   | - | - | - | - | - | + |

  

|            |     |    |    |    |    |    |
|------------|-----|----|----|----|----|----|
| DMSO       | 100 | 76 | 55 | 54 | 55 | 57 |
| AM251      | 94  | 58 | 53 | 51 | 54 | 49 |
| AM281      | 85  | 62 | 40 | 39 | 61 | 37 |
| JD5037     | 83  | 45 | 42 | 39 | 53 | 31 |
| Rimonabant | 83  | 43 | 25 | 28 | 29 | 21 |
| Otenabant  | 89  | 60 | 34 | 47 | 45 | 55 |
| TM3837     | 83  | 67 | 48 | 46 | 58 | 43 |
| CB1-IN-1   | 89  | 39 | 22 | 45 | 47 | 46 |

% Cell viability compared to control

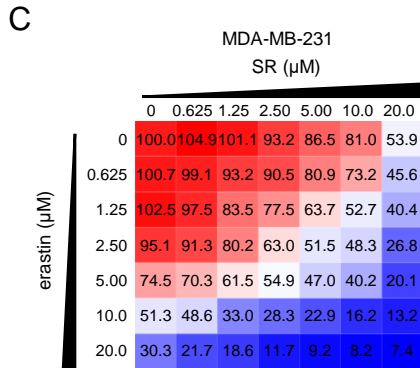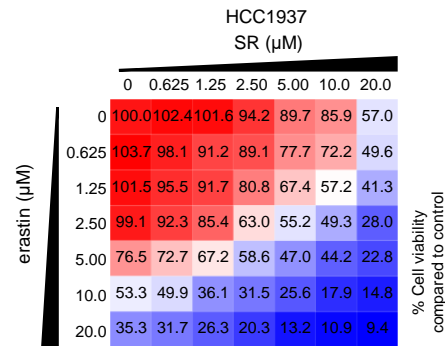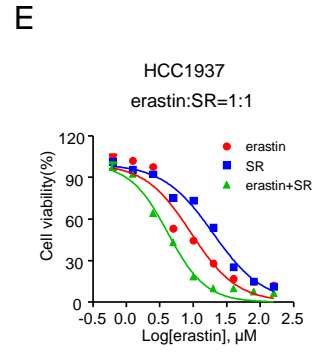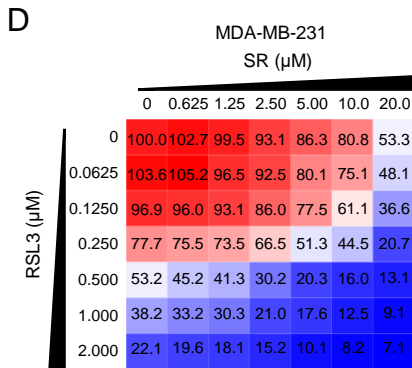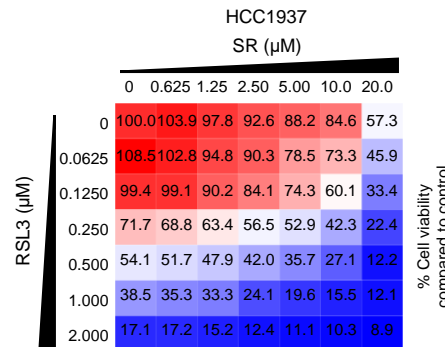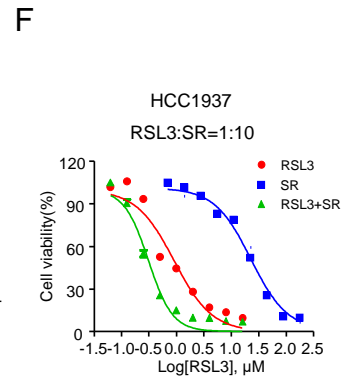

# Supplementary Figure 2

**A**

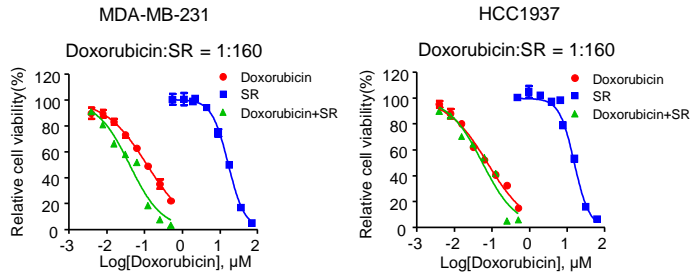

CI values for SR + Doxorubicin

| Cell line  | Fa = 0.5 | Fa = 0.75 | Fa = 0.90 |
|------------|----------|-----------|-----------|
| MDA-MB-231 | 5.51     | 4.45      | 3.62      |
| HCC1937    | 6.18     | 8.61      | 12.98     |

**B**

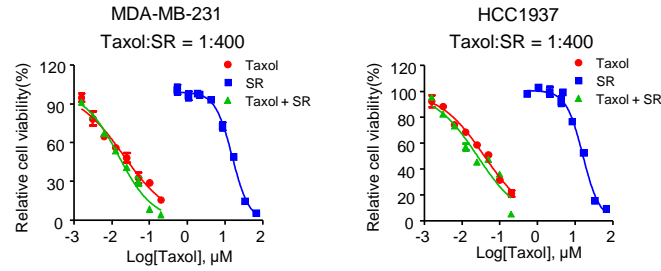

CI values for SR + Taxol

| Cell line  | Fa = 0.5 | Fa = 0.75 | Fa = 0.90 |
|------------|----------|-----------|-----------|
| MDA-MB-231 | 8.25     | 6.81      | 5.81      |
| HCC1937    | 3.47     | 3.65      | 4.08      |

**C**

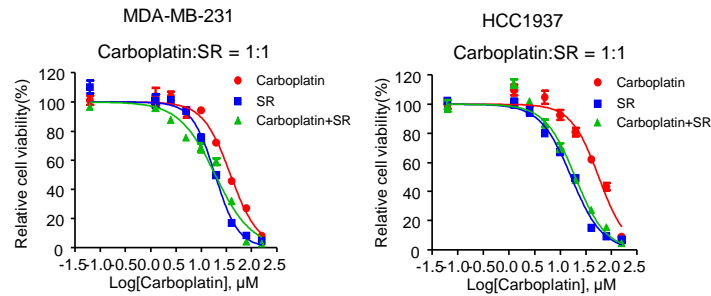

CI values for SR + Carboplatin

| Cell line  | Fa = 0.5 | Fa = 0.75 | Fa = 0.90 |
|------------|----------|-----------|-----------|
| MDA-MB-231 | 3.39     | 2.84      | 2.38      |
| HCC1937    | 7.67     | 7.75      | 7.90      |

**D**

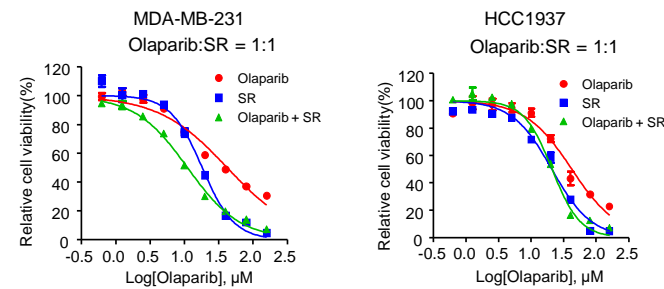

CI values for SR + Olaparib

| Cell line  | Fa = 0.5 | Fa = 0.75 | Fa = 0.90 |
|------------|----------|-----------|-----------|
| MDA-MB-231 | 4.03     | 3.25      | 2.63      |
| HCC1937    | 7.36     | 5.21      | 3.69      |

# Supplementary Figure 3

**A**

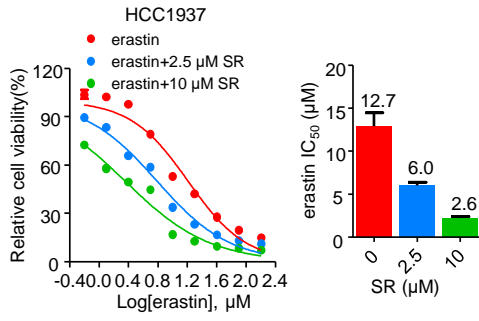

**B**

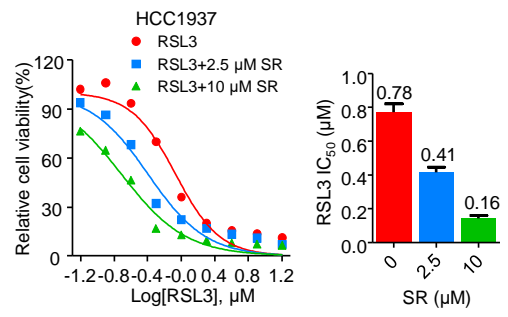

**C**

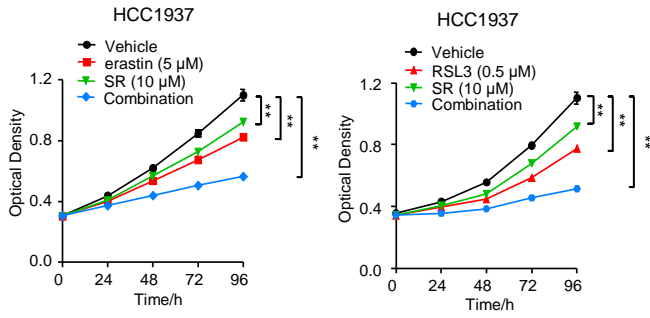

**D**

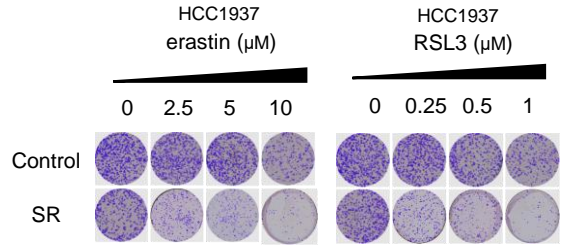

# Supplementary Figure 4

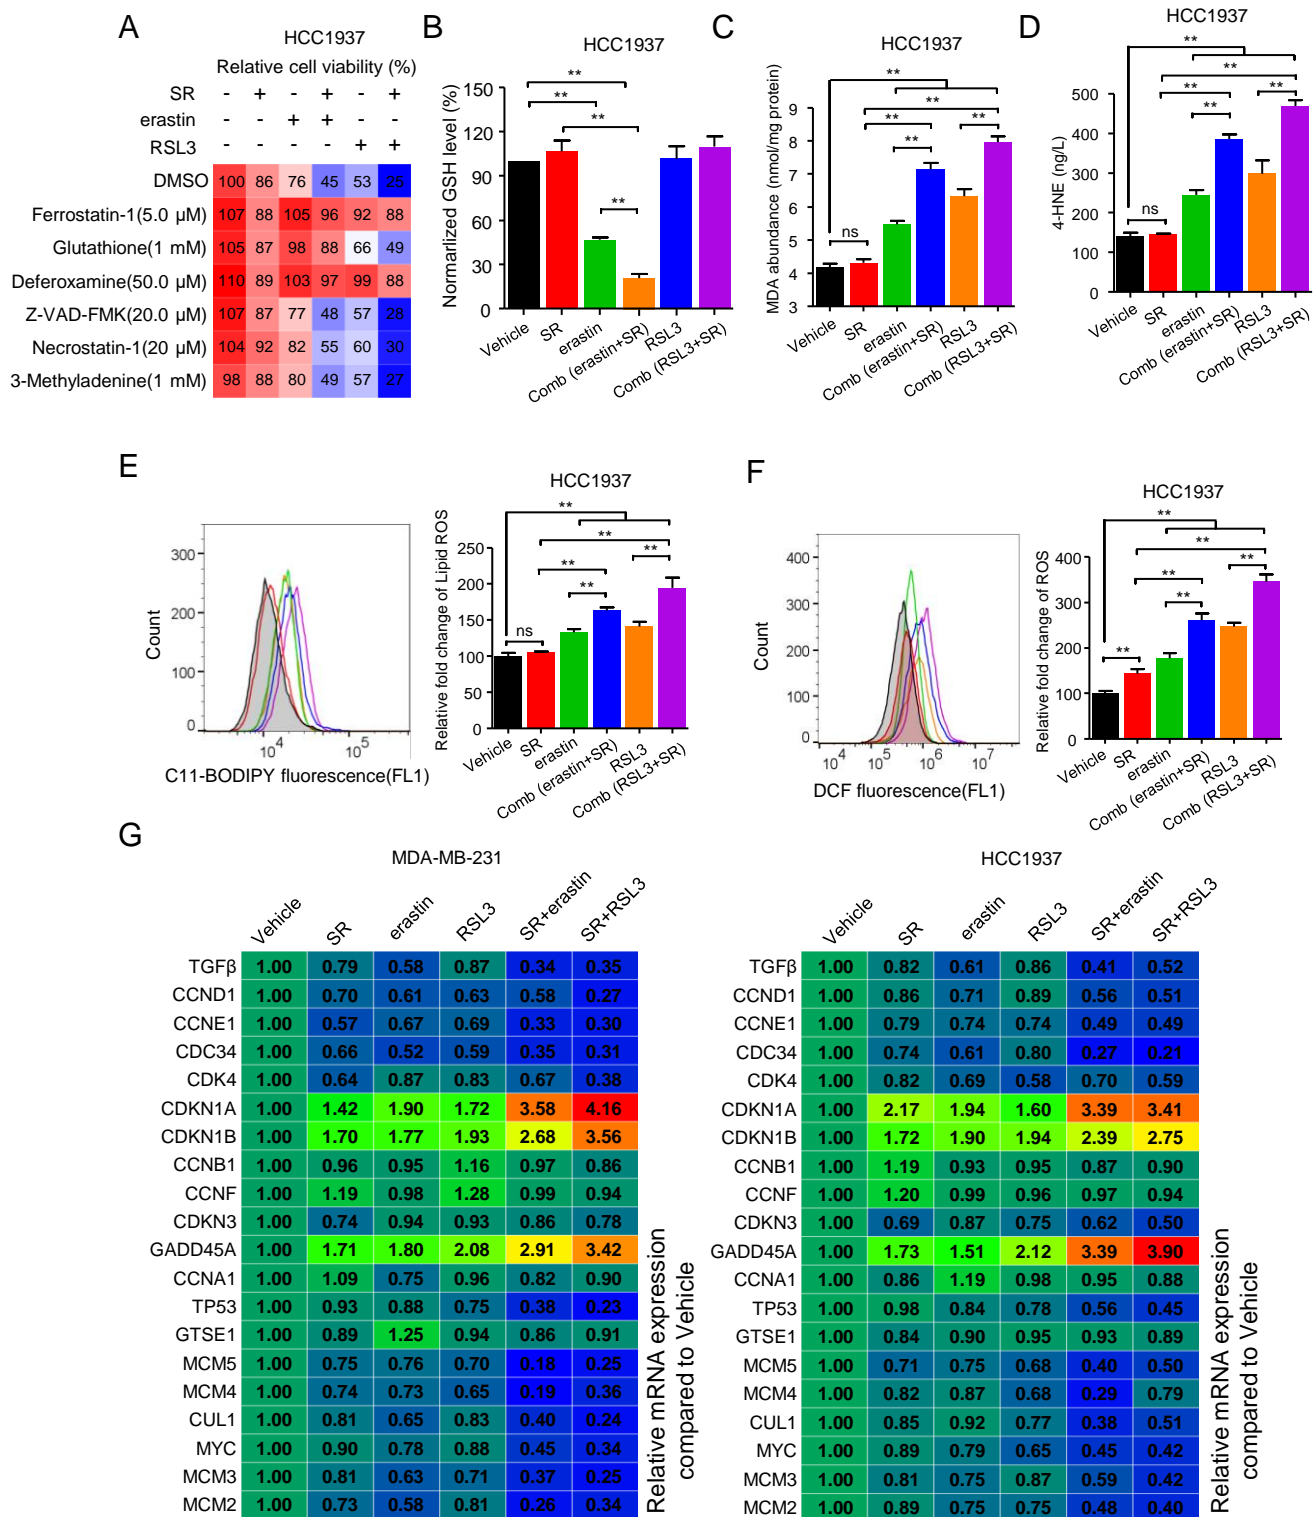

# Supplementary Figure 5

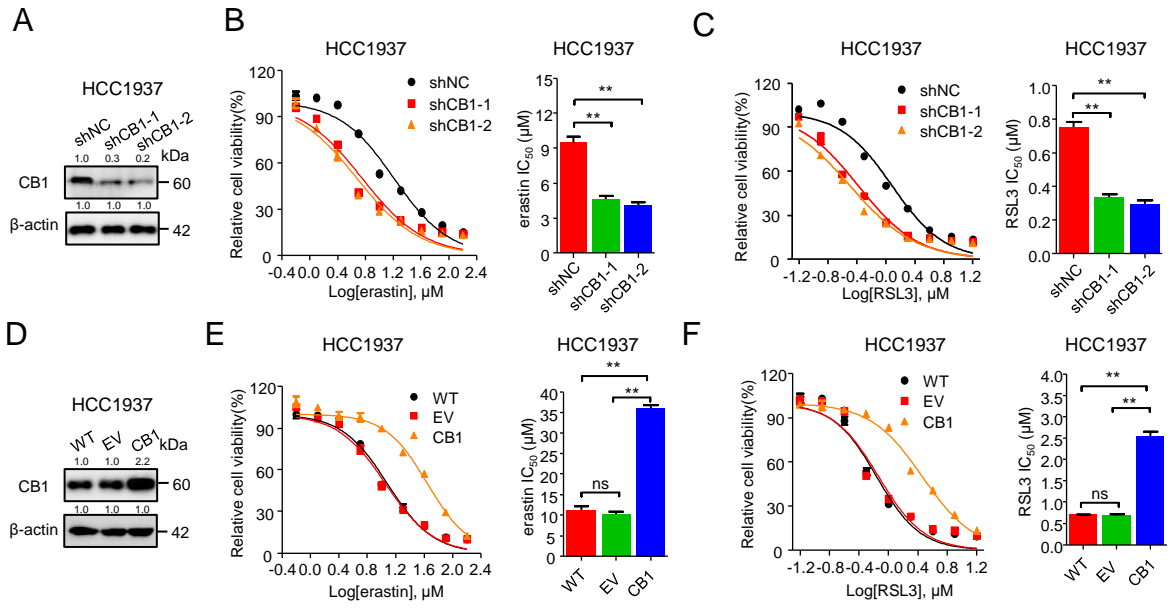

# Supplementary Figure 6

**A**

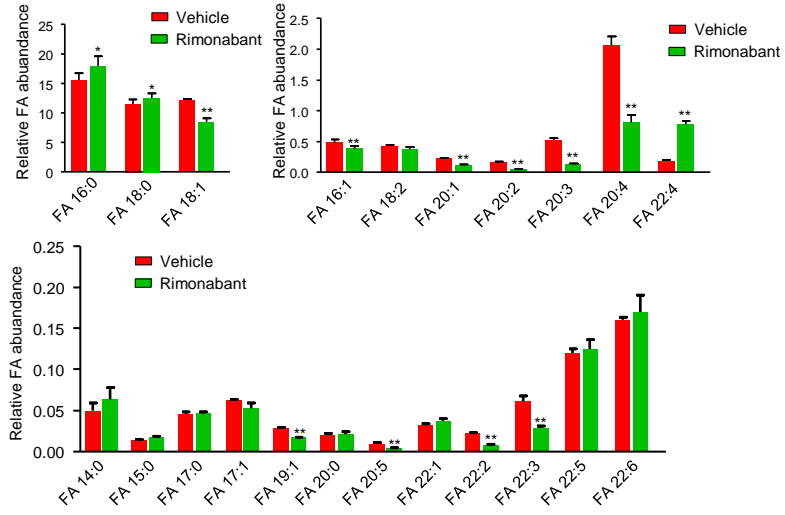

**B**

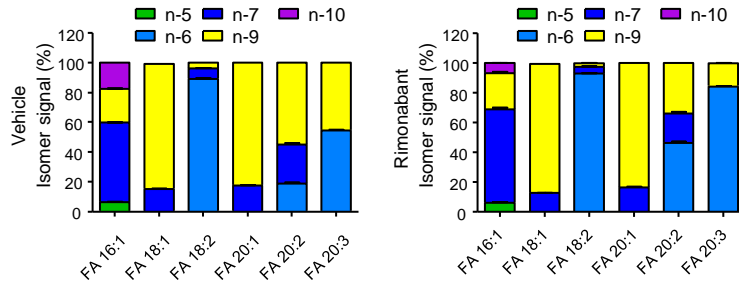

# Supplementary Figure 7

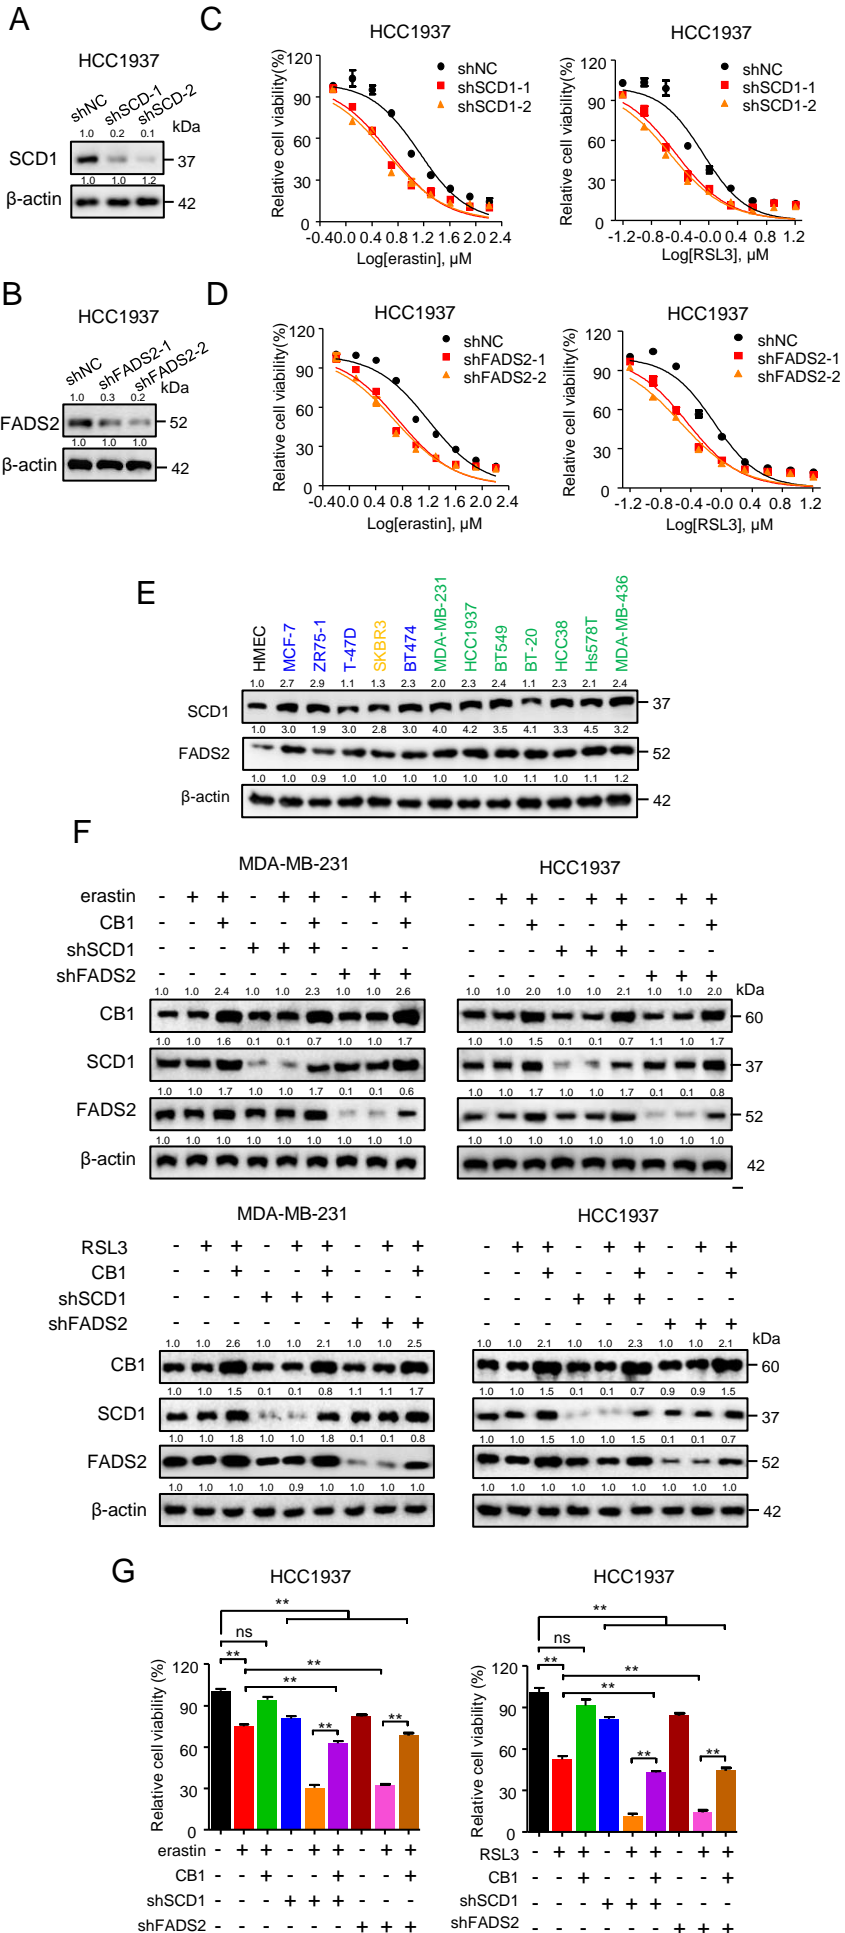

# Supplementary Figure 8

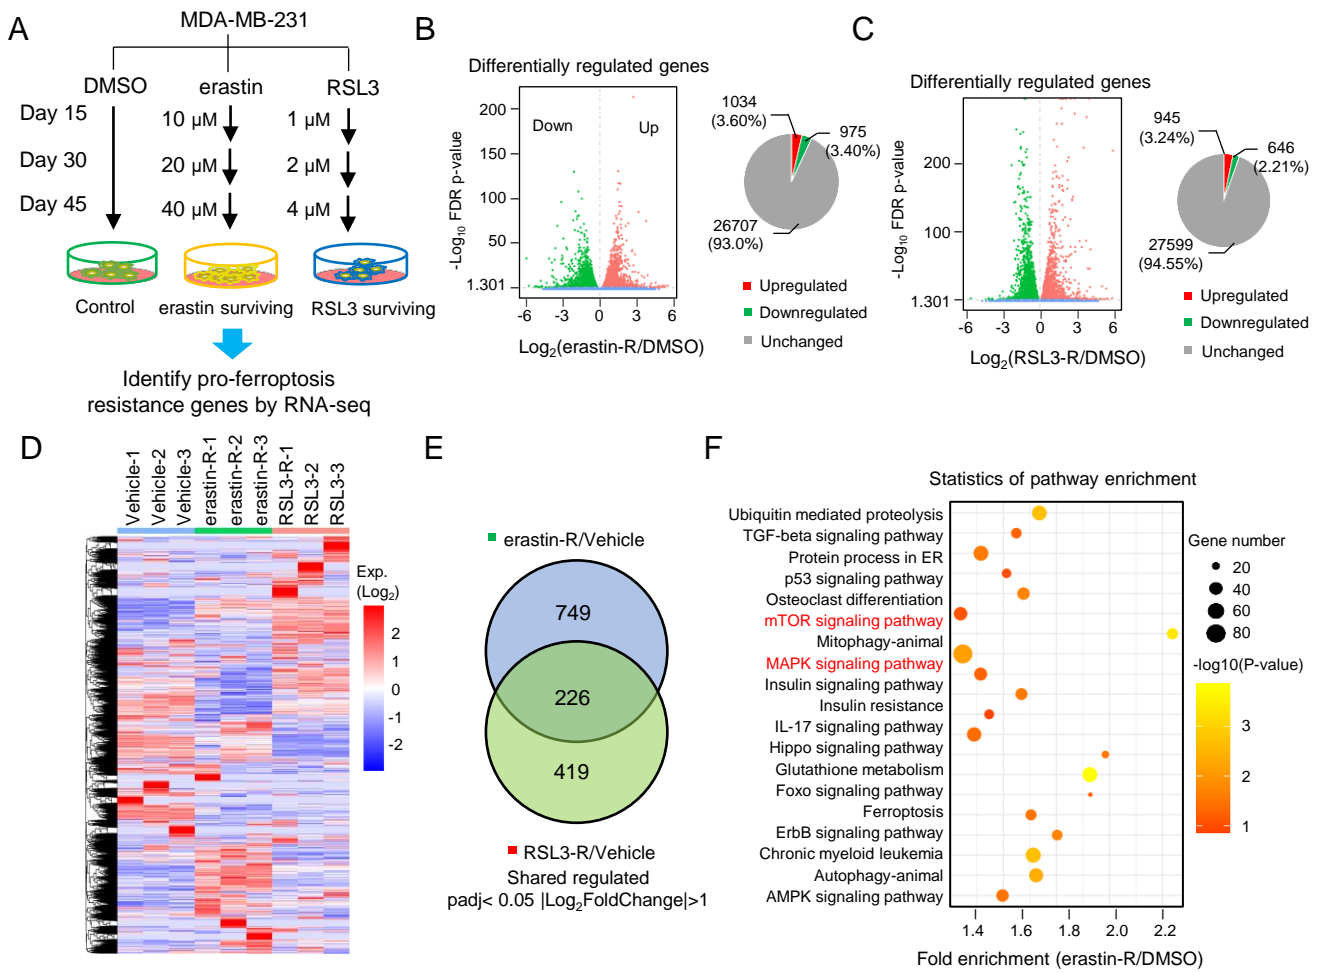



# Supplementary Figure 9

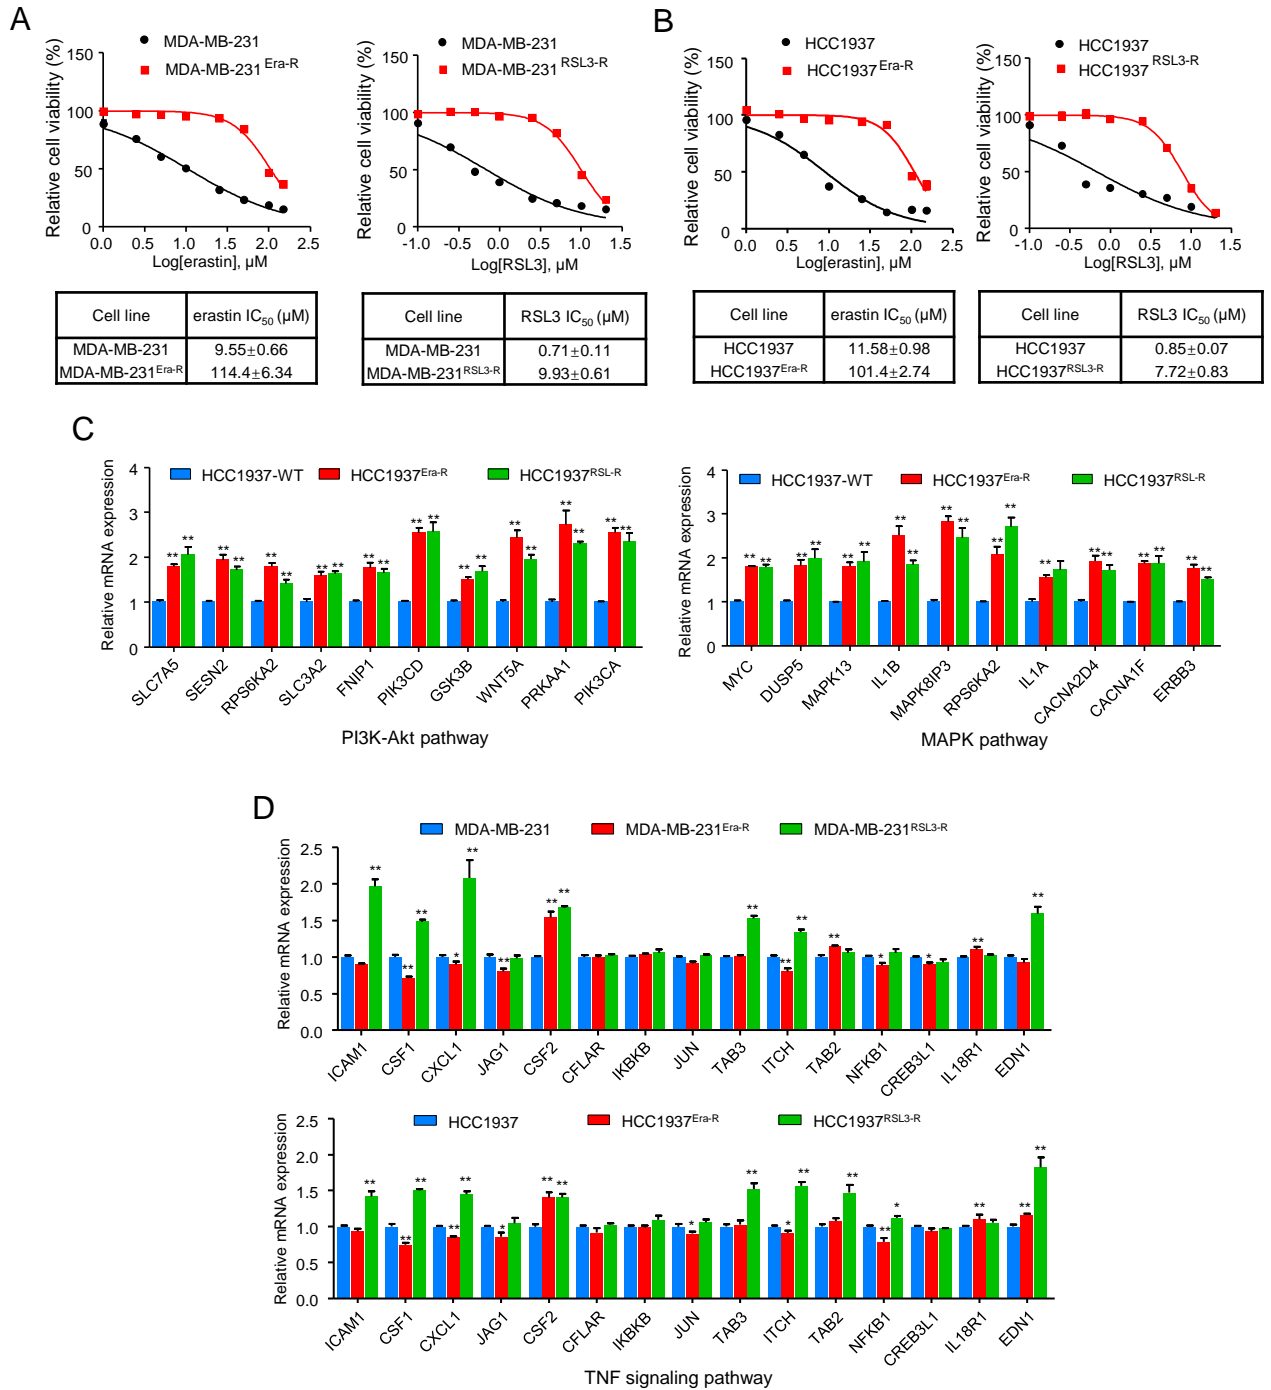

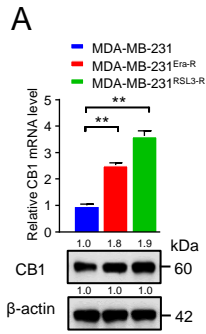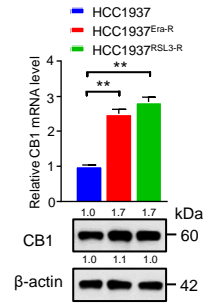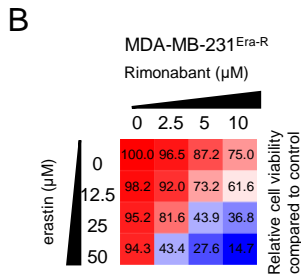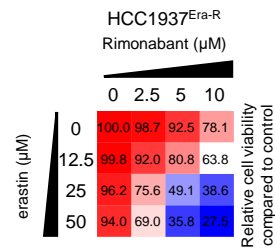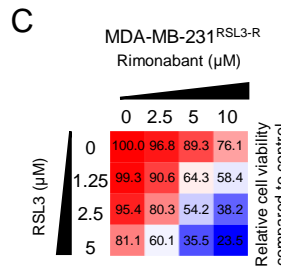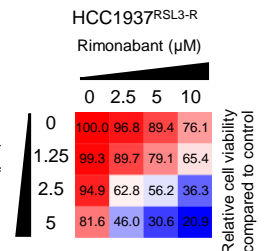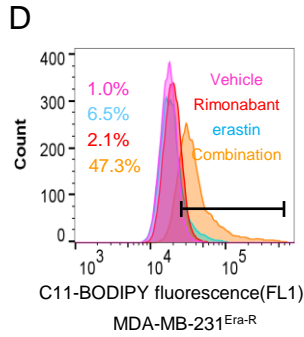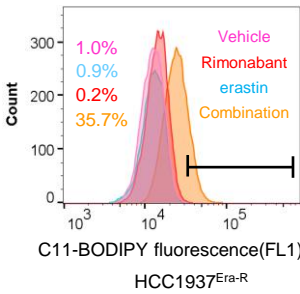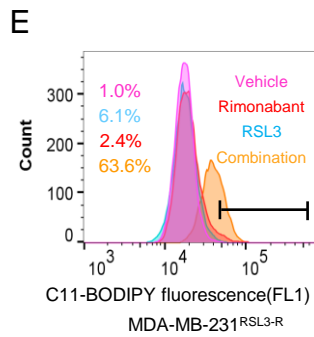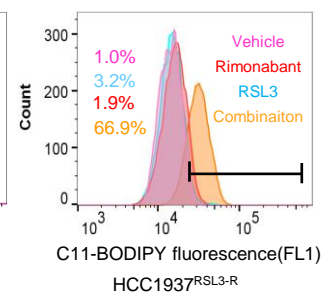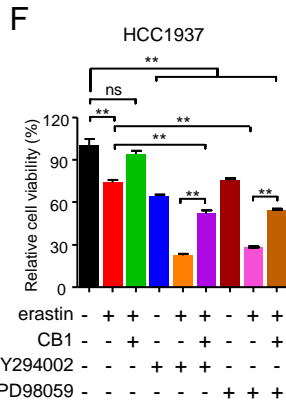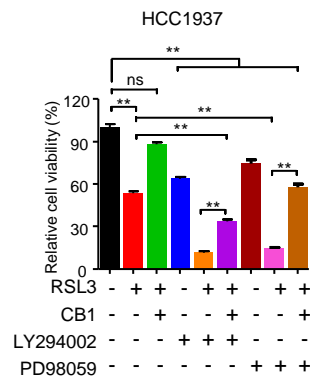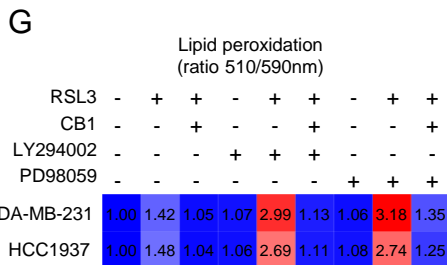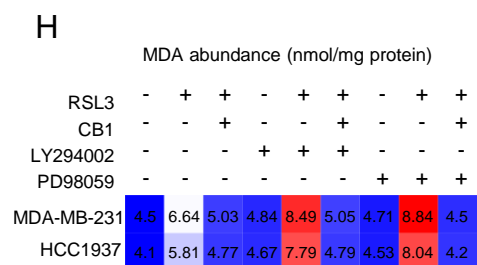

# Supplementary Figure 11

**A**

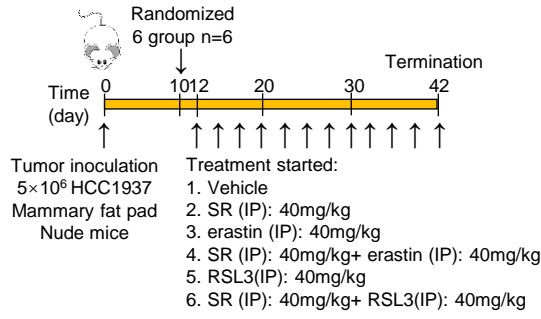

**B**

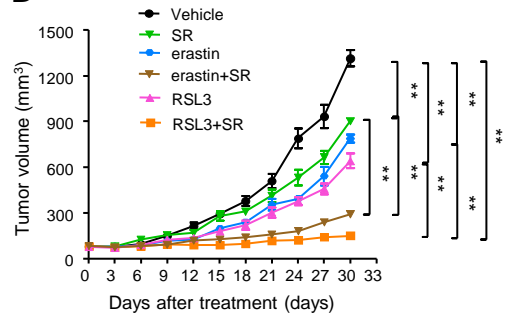

**C**

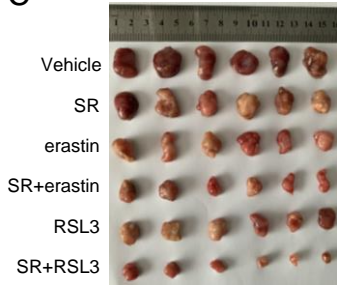

**D**

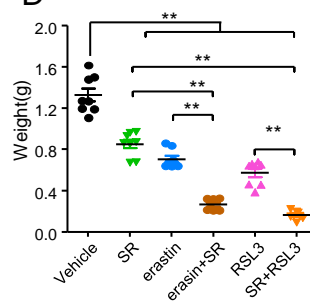

**E**

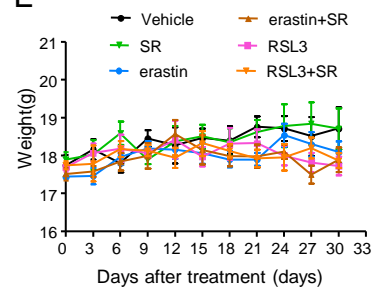

**F**

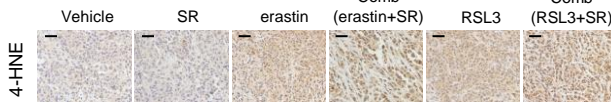

**G**

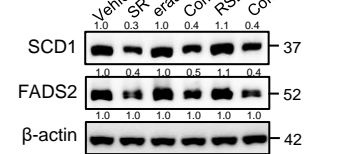

# Supplementary Figure 12

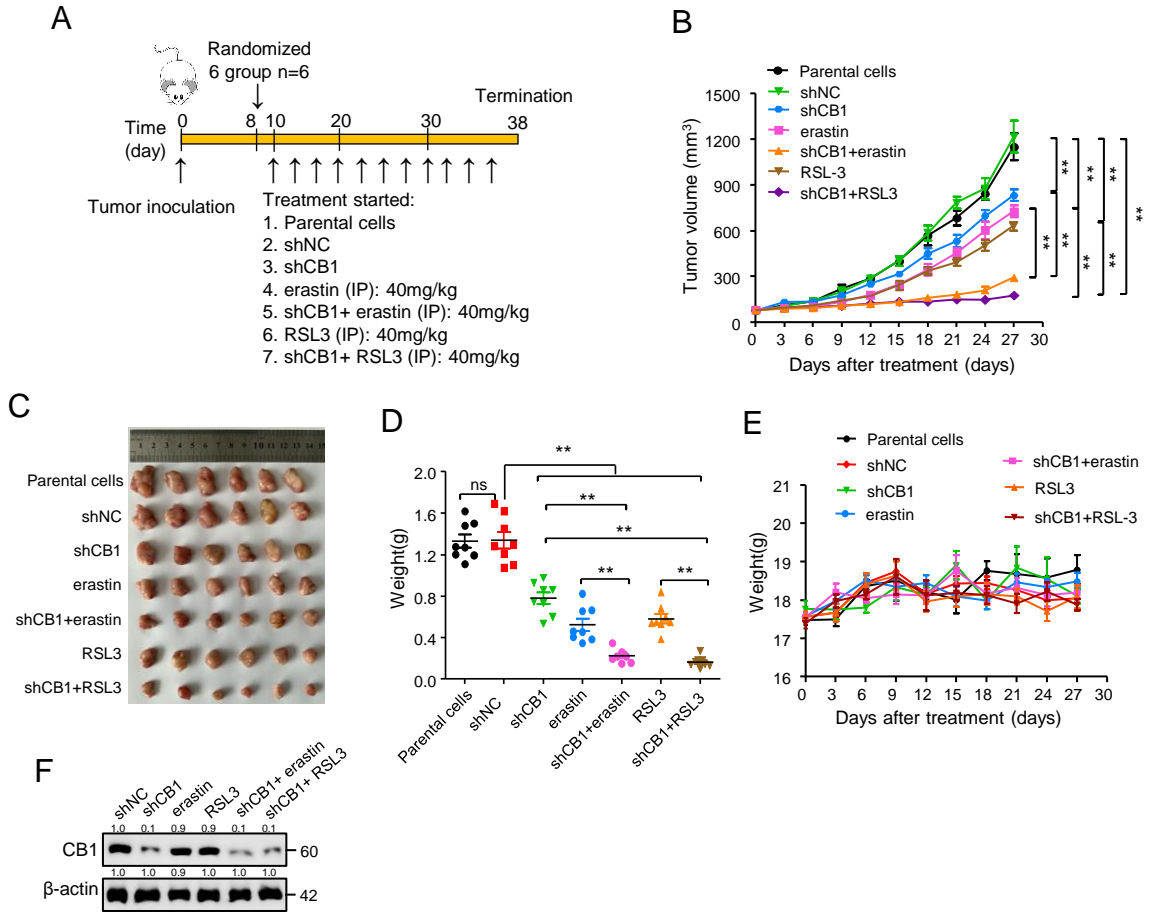

Supplement: 41419_2022_5242_MOESM1_ESM.pdf [file 41419_2022_5242_MOESM1_ESM.pdf]
